# Supplementary material for: Prediction of outcome from MRI and general movements assessment after hypoxic-ischaemic encephalopathy in low-income and middle-income countries: data from a randomised controlled trial
Source: PubMed Central journal article supplement — Arch Dis Child Fetal Neonatal Ed. 2021 Jun 10;107(1):32–8. doi: 10.1136/archdischild-2020-321309 (PMC8685634; doi:10.1136/archdischild-2020-321309), 2021-06-10
Supplement: archdischild-2020-321309supp001.pdf [file archdischild-2020-321309supp001.pdf]

## Supplementary online content

|                                                                                                      |   |
|------------------------------------------------------------------------------------------------------|---|
| eTable 1. Demographics and neonatal characteristics according to treatment group.....                | 2 |
| eTable 2. General movements assessment and outcomes according to treatment group .....               | 3 |
| eTable 3. Normal/mildly abnormal MRI with adverse outcome .....                                      | 4 |
| eTable 4. Moderately/severely abnormal MRI and/or absent fidgety movements with normal outcome ..... | 4 |

**eTable 1.** Demographics and neonatal characteristics according to treatment group\*

|                                                       | <b>Therapeutic hypothermia (n=25)</b> | <b>Standard care (n=25)</b> | <b>Total (n=50)</b> |
|-------------------------------------------------------|---------------------------------------|-----------------------------|---------------------|
| Inborn, n/N (%)                                       | 13/25 (52.0)                          | 17/25 (68.0)                | 30/50 (60.0)        |
| Male gender, n/N (%)                                  | 17/25 (68.0)                          | 16/25 (64.0)                | 33/50 (66.0)        |
| Gestational age (weeks), mean (SD) <sup>†</sup>       | 39.1 (1.3)                            | 39.2 (1.4)                  | 39.1 (1.3)          |
| Birth weight (g), mean (SD)                           | 2911 (483)                            | 2960 (553)                  | 2935 (515)          |
| Small for gestational age, n/N (%) <sup>‡</sup>       | 7/25 (28.0)                           | 7/23 (30.4)                 | 14/48 (29.2)        |
| 5-min Apgar score, n/N (%)                            |                                       |                             |                     |
| 0-3                                                   | 5/22 (22.7)                           | 1/21 (4.8)                  | 6/43 (14.0)         |
| 4-6                                                   | 13/22 (59.1)                          | 12/21 (57.1)                | 25/43 (58.1)        |
| 7-10                                                  | 4/22 (18.2)                           | 8/21 (38.1)                 | 12/43 (27.9)        |
| Cord/blood <60min pH, mean (SD) <sup>§</sup>          | 6.81 (0.12)                           | 6.93 (0.18)                 | 6.89 (0.17)         |
| Cord/blood <60min base excess, mean (SD) <sup>¶</sup> | -19.6 (3.2)                           | -16.5 (4.6)                 | -17.7 (4.4)         |
| HIE stage at randomisation, n/N (%)                   |                                       |                             |                     |
| Moderate                                              | 24/25 (96.0)                          | 24/25 (96.0)                | 48/50 (96.0)        |
| Severe                                                | 1/25 (4.0)                            | 1/25 (4.0)                  | 2/50 (4.0)          |
| Thompson score, median (IQR)                          |                                       |                             |                     |
| At randomisation                                      | 9 (8-10)                              | 9 (8.5-12)                  | 9 (8-11)            |
| Day 7/at discharge <sup>**</sup>                      | 2 (1-3.25)                            | 2 (2-3.25)                  | 2 (2-3)             |
| Injury pattern on MRI, n/N (%)                        |                                       |                             |                     |
| Normal                                                | 4/23 (17.4)                           | 2/23 (8.7)                  | 6/46 (13.0)         |
| Only mild/moderate WM injury                          | 4/23 (17.4)                           | 5/23 (21.7)                 | 9/46 (19.6)         |
| Only severe WM injury                                 | 0                                     | 1/23 (4.3)                  | 1/46 (2.2)          |
| Mild BGT, no/mild/moderate WM injury                  | 13/23 (56.5)                          | 6/23 (26.1)                 | 19/46 (41.3)        |
| Mild BGT, severe WM injury                            | 1/23 (4.3)                            | 0                           | 1/46 (2.2)          |
| Moderate BGT, any WM injury                           | 1/23 (4.3)                            | 5/23 (21.7)                 | 6/46 (13.0)         |
| Global                                                | 0                                     | 4/23 (17.4)                 | 4/46 (8.7)          |

\*Percentages are based on the number of infants for whom data were available. HIE, hypoxic-ischaemic encephalopathy; WM, white matter; BGT, basal ganglia and thalami.

<sup>†</sup>Data were unavailable for two infants in the standard care group.

<sup>‡</sup>Small for gestational age defined as birth weight less than the 10th percentile according to the Intergrowth 21st chart.

<sup>§</sup>Data were unavailable for 13 infants in therapeutic hypothermia group and seven in standard care group. Cord pH was not available in outborn infants.

<sup>¶</sup>Data were unavailable for 14 infants in therapeutic hypothermia group and eight in standard care group. Cord base excess was not available in outborn infants.

<sup>\*\*</sup>Data were unavailable for three infants in therapeutic hypothermia group (two died) and seven in standard care group (five died).

**eTable 2.** General movements assessment and outcomes according to treatment group\*

|                                             | <b>Therapeutic hypothermia (n=25)</b> | <b>Standard care (n=25)</b> | <b>Total (n=50)</b> | <b>P value</b>     |
|---------------------------------------------|---------------------------------------|-----------------------------|---------------------|--------------------|
| <b>Fidgety movements</b>                    |                                       |                             |                     |                    |
| Absent (-)                                  | 3/21 (14.3)                           | 6/18 (33.3)                 | 9/39 (23.1)         | 0.255 <sup>†</sup> |
| Sporadic (+/-)                              | 4/21 (19.0)                           | 6/18 (33.3)                 | 10/39 (25.6)        |                    |
| Intermittent (+)                            | 12/21 (57.1)                          | 6/18 (33.3)                 | 18/39 (46.2)        |                    |
| Continual (++)                              | 1/21 (4.8)                            | 0                           | 1/39 (2.6)          |                    |
| Exaggerated                                 | 1/21 (4.8)                            | 0                           | 1/39 (2.6)          |                    |
| <b>Adverse outcome<sup>‡</sup></b>          | 5/24 (20.8)                           | 12/23 (52.2)                | 17/47 (36.2)        | 0.025              |
| <b>Death</b>                                | 2/24 (8.3)                            | 6/23 (26.1)                 | 8/47 (17.0)         | 0.105              |
| <b>Bayley-III cognitive composite score</b> |                                       |                             |                     | 0.019              |
| <70                                         | 0                                     | 3/16 (18.8)                 | 3/38 (7.9)          |                    |
| 70-84                                       | 2/22 (9.1)                            | 3/16 (18.8)                 | 5/38 (13.2)         |                    |
| ≥85                                         | 20/22 (90.9)                          | 10/16 (62.5)                | 30/38 (78.9)        |                    |
| <b>Bayley-III motor composite score</b>     |                                       |                             |                     | 0.074              |
| <70                                         | 0                                     | 3/16 (18.8)                 | 3/38 (7.9)          |                    |
| 70-84                                       | 2/22 (9.1)                            | 1/16 (6.3)                  | 3/38 (7.9)          |                    |
| ≥85                                         | 20/22 (90.9)                          | 12/16 (75.0)                | 32/38 (84.2)        |                    |
| <b>Cerebral palsy</b>                       | 1/22 (4.5)                            | 3/16 (18.8)                 | 4/38 (10.5)         | 0.159              |
| <b>GMFCS</b>                                |                                       |                             |                     |                    |
| Level 1                                     | 1/22 (4.5)                            | 1/16 (6.3)                  | 2/38 (5.3)          |                    |
| Level 5                                     | 0                                     | 2/16 (12.5)                 | 2/38 (5.3)          |                    |

\*Percentages are based on the number of infants for whom data were available. Bayley-III, Bayley Scales of Infant and Toddler Development, third edition; GMFCS, gross motor function classification system.

<sup>†</sup>P value based on Fisher exact test on absent versus present fidgety movements.

<sup>‡</sup>Adverse outcome defined as death, cerebral palsy with GMFCS level 3-5 or Bayley-III cognitive and/or motor composite score <85.

**eTable 3.** Normal/mildly abnormal MRI\* with adverse outcome\*\*

| No | Rando-<br>misation | BGT    | PLIC      | WM       | Fidgety<br>movements | Bayley-III<br>cognitive<br>CS | Bayley-III<br>motor CS | CP |
|----|--------------------|--------|-----------|----------|----------------------|-------------------------------|------------------------|----|
| 1  | Non-cooled         | Mild   | Normal    | Normal   | Absent               | 80                            | 79                     | No |
| 2  | Cooled             | Normal | Normal    | Moderate | Intermittent         | 100                           | 76                     | No |
| 3  | Cooled             | Mild   | Equivocal | Moderate | Intermittent         | 80                            | 70                     | No |
| 4  | Cooled             | Mild   | Equivocal | Normal   | Intermittent         | 80                            | 89                     | No |
| 5  | Non-cooled         | Mild   | Normal    | Moderate | Sporadic             | 80                            | 118                    | No |

BGT, basal ganglia and thalami; PLIC, posterior limb of the internal capsule; WM, white matter; Bayley-III, Bayley Scales of Infant and Toddler Development, third edition; CS, composite score; CP, cerebral palsy.

\*Normal/mildly abnormal MRI defined as normal/mild BGT score and/or normal/mild/moderate WM score.

\*\*Adverse outcome defined as death, cerebral palsy with gross motor function classification system (GMFCS) level 3-5 or Bayley-III cognitive and/or motor composite score <85.

**eTable 4.** Moderately/severely abnormal MRI\* and/or absent fidgety movements with normal outcome\*\*

| No | Rando-<br>misation | BGT      | PLIC      | WM     | Fidgety<br>movements | Bayley-III<br>cognitive<br>CS | Bayley-<br>III motor<br>CS | CP |
|----|--------------------|----------|-----------|--------|----------------------|-------------------------------|----------------------------|----|
| 6  | Cooled             | Normal   | Normal    | Mild   | Absent               | 90                            | 112                        | No |
| 7  | Cooled             | Mild     | Normal    | Mild   | Absent               | 95                            | 91                         | No |
| 8  | Cooled             | Mild     | Normal    | Severe | Intermittent         | 95                            | 100                        | No |
| 9  | Non-cooled         | Normal   | Normal    | Severe | Intermittent         | 100                           | 115                        | No |
| 10 | Cooled             | Moderate | Equivocal | Normal | Absent               | 100                           | 118                        | No |

BGT, basal ganglia and thalami; PLIC, posterior limb of the internal capsule; WM, white matter; Bayley-III, Bayley Scales of Infant and Toddler Development, third edition; CS, composite score; CP, cerebral palsy.

\*Moderately/severely abnormal MRI defined as moderate/severe BGT score and/or absent PLIC and/or severe WM score.

\*\*Normal outcome defined as survival without cerebral palsy with gross motor function classification system (GMFCS) level 3-5 or Bayley-III cognitive and/or motor composite score <85.
